1 **Twelve Platinum-Standard Reference Genomes Sequences (PSRefSeq) that**  
2 **complete the full range of genetic diversity of Asian rice**

3  
4 Yong Zhou<sup>1a</sup>, Dmytro Chebotarov<sup>2a</sup>, Dave Kudrna<sup>3</sup>, Victor Llaca<sup>4</sup>, Seunghee Lee<sup>3</sup>,  
5 Shanmugam Rajasekar<sup>3</sup>, Nahed Mohammed<sup>1</sup>, Noor Al-Bader<sup>1</sup>, Chandler Sobel-  
6 Sorenson<sup>3</sup>, Praveena Parakkal<sup>4</sup>, Lady Johanna Arbelaez<sup>5</sup>, Natalia Franco<sup>5</sup>, Nickolai  
7 Alexandrov<sup>2</sup>, N. Ruairaidh Sackville Hamilton<sup>2</sup>, Hei Leung<sup>2</sup>, Ramil Mauleon<sup>2</sup>, Mathias  
8 Lorieux<sup>5,6</sup>, Andrea Zuccolo<sup>1,7\*</sup>, Kenneth McNally<sup>2\*</sup>, Jianwei Zhang<sup>3,8\*</sup>, Rod A. Wing<sup>1,2,3\*</sup>

9  
10 <sup>1</sup>Center for Desert Agriculture, Biological and Environmental Sciences & Engineering  
11 Division (BESE), King Abdullah University of Science and Technology (KAUST),  
12 Thuwal, 23955-6900, Saudi Arabia

13 <sup>2</sup>International Rice Research Institute (IRRI), Strategic Innovation, Los Baños, 4031  
14 Laguna, Philippines

15 <sup>3</sup>Arizona Genomics Institute, School of Plant Sciences, University of Arizona, Tucson,  
16 Arizona 85721, USA

17 <sup>4</sup>Genomics Technologies, Applied Science and Technology, Corteva Agriscience™, IA  
18 50131, USA

19 <sup>5</sup>Rice Genetics and Genomics Lab, International Center for Tropical Agriculture (CIAT),  
20 Cali, Colombia

21 <sup>6</sup>University of Montpellier, DIADE, IRD, France

22 <sup>7</sup>Institute of Life Sciences, Scuola Superiore Sant'Anna, Pisa, Italy

23 <sup>8</sup>National Key Laboratory of Crop Genetic Improvement, Huazhong Agricultural  
24 University, Wuhan 430070, China

25 Yong Zhou<sup>1a</sup>, [yong.zhou@kaust.edu.sa](mailto:yong.zhou@kaust.edu.sa), ORCID 0000-0002-1662-9589

26 Dmytro Chebotarov<sup>2a</sup>, [d.chebotarov@irri.org](mailto:d.chebotarov@irri.org), ORCID 0000-0003-1351-9453

27 Dave Kudrna<sup>3</sup>, [dkudrna@email.arizona.edu](mailto:dkudrna@email.arizona.edu), ORCID 0000-0002-3092-3629

28 Victor Llaca<sup>4</sup>, [victor.llaca@corteva.com](mailto:victor.llaca@corteva.com), ORCID 0000-0003-4822-2924

29 Seunghee Lee<sup>3</sup>, [seunghl@ag.arizona.edu](mailto:seunghl@ag.arizona.edu),

30 Shanmugam Rajasekar<sup>3</sup>, [shans@email.arizona.edu](mailto:shans@email.arizona.edu),

31 Nahed Mohammed<sup>1</sup>, [nahed.mohammed@kaust.edu.sa](mailto:nahed.mohammed@kaust.edu.sa), ORCID 0000-0002-8857-3246

32 Noor Al-Bader<sup>1</sup>, [noor.albader@kaust.edu.sa](mailto:noor.albader@kaust.edu.sa), ORCID 0000-0002-0511-6972

33 Chandler Sobel-Sorenson<sup>3</sup>, [scar@email.arizona.edu](mailto:scar@email.arizona.edu),

34 Praveena Parakkal<sup>4</sup>, [Praveena.parakkal@corteva.com](mailto:Praveena.parakkal@corteva.com),

35 Lady Johanna Arbelaez<sup>5</sup>, layoar@gmail.com,  
36 Natalia Franco<sup>5</sup>, n.franco@cgiar.org,  
37 Nickolai Alexandrov<sup>2</sup>, nickolai.alexandrov@gmail.com, ORCID 0000-0003-3381-0918  
38 N. Ruairaidh Sackville Hamilton<sup>2</sup>, ruairaidh.sh@gmail.com>, ORCID 0000-0002-8467-  
39 0110  
40 Hei Leung<sup>2</sup>, h.leung@irri.org,  
41 Ramil Mauleon<sup>2</sup>, ramil.mauleon@scu.edu.au, ORCID 0000-0001-8512-144X  
42 Current address: Southern Cross Plant Science, Southern Cross University, Lismore,  
43 Australia  
44 Mathias Lorieux<sup>5,6</sup>, mathias.lorieux@ird.fr, ORCID 0000-0001-9864-3933  
45 Andrea Zuccolo<sup>1,7\*</sup>, andrea.zuccolo@kaust.edu, ORCID 0000-0001-7574-0714  
46 Kenneth McNally<sup>2\*</sup>, k.mcnally@irri.org, ORCID 0000-0002-9613-5537  
47 Jianwei Zhang<sup>3,8\*</sup>, jzhang@mail.hzau.edu.cn, ORCID 0000-0001-8030-5346  
48 Rod A. Wing<sup>1,2,3\*</sup>, rwing@email.arizona.edu, ORCID 0000-0001-6633-622  
49

50 <sup>a</sup>These authors contributed equally to this work.

51 \*Correspondence and requests for materials should be addressed to: Andrea Zuccolo  
52 (email: andrea.zuccolo@kaust.edu), Kenneth McNally (email: k.mcnally@irri.org),  
53 Jianwei Zhang (email: jzhang@mail.hzau.edu.cn), or Rod A. Wing (email:  
54 rod.wing@kaust.edu.sa; rwing@email.arizona.edu).

55 **Abstract**

56

57 As the human population grows from 7.8 billion to 10 billion over the next 30 years,  
58 breeders must do everything possible to create crops that are highly productive and  
59 nutritious, while simultaneously having less of an environmental footprint. Rice will play  
60 a critical role in meeting this demand and thus, knowledge of the full repertoire of genetic  
61 diversity that exists in germplasm banks across the globe is required. To meet this  
62 demand, we describe the generation, validation and preliminary analyses of transposable  
63 element and long-range structural variation content of 12 near-gap-free reference genome  
64 sequences (RefSeqs) from representatives of 12 of 15 subpopulations of cultivated rice.  
65 When combined with 4 existing RefSeqs, that represent the 3 remaining rice  
66 subpopulations and the largest admixed population, this collection of 16 Platinum  
67 Standard RefSeqs (PSRefSeq) can be used as a pan-genome template to map  
68 resequencing data to detect virtually all standing natural variation that exists in the pan-  
69 cultivated rice genome.

## 70 **Background & Summary**

71 Asian cultivated rice is a staple food for half of the world population. With the planet's  
72 population expected to reach 10 billion by 2050, farmers must increase production by at  
73 least 100 million metric tons per year (Seck et al 2012; Merrey et al. 2018). To address  
74 this need, future rice cultivars should provide higher yields, be more nutritious, be  
75 resilient to multiple abiotic and biotic stresses, and have less of an environmental  
76 footprint (Wing et al. 2018; 3K RGP 2014). To achieve this goal, a comprehensive and  
77 more in-depth understanding of the full range of genetic diversity of the pan-cultivated  
78 rice genome and its wild relatives will be needed (Stein et al. 2018).

79 With a genome size of ~390 Mb, rice has the smallest genome among the  
80 domesticated cereals, making it particularly amenable to genomic studies (Kawahara et  
81 al. 2013) and the primary reason why it was the first crop genome to be sequenced 15  
82 years ago (International Rice Genome Sequencing 2005). To better understand the full-  
83 range of genetic diversity that is stored in rice germplasm banks around the world,  
84 several studies have been conducted using microarrays (Thomson et al. 2017; McNally et  
85 al. 2009) and low coverage skim sequencing (Huang et al. 2012; Zhao et al. 2018). In  
86 2018, a detailed analysis of the Illumina resequencing of more than 3,000 diverse rice  
87 accessions (a.k.a. 3K-RG), aligned to the *O. sativa* v.g. japonica cv. Nipponbare  
88 reference genome sequence (a.k.a. IRGSP RefSeq), showed how the high genetic  
89 diversity present in domesticated rice populations provides a solid base for the  
90 improvement of rice cultivars (Wang et al. 2018). One key finding from a population  
91 structure analysis of this dataset showed that the 3,000 accessions can be subdivided into  
92 nine subpopulations, where most accessions from close sub-groups could be associated to  
93 geographic origin (Wang et al. 2018).

94 One critical piece of information missing from these analyses is the fact that single  
95 nucleotide polymorphisms (SNPs) and structural variations (SVs) present in  
96 subpopulation specific genomic regions have yet to be detected because the 3K-RG data  
97 set was only aligned to a single reference genome. Therefore, the next logical step, to  
98 capture and understand genetic variation pan-subpopulation-wide is to map the 3K-RG  
99 dataset to high-quality reference genomes that represent each of the subpopulations of  
100 cultivated Asian rice. At present, only a handful high-quality rice genomes for cultivated  
101 rice are publicly available (Kawahara et al. 2013, Zhang et al. 2016a, Zhang et al. 2016b  
102 and Stein et al. 2018), thus, there is an immediate need for such a comprehensive  
103 resource to be created, which is the subject of this Data Descriptor.

104 Here we present a reanalysis of the population structure analysis discussed above  
105 (Wang et al. 2018) and show that the 3K-RG dataset can be further subdivided into a total  
106 of 15 subpopulations. We then present the generation of 12 new and near-gap-free high-  
107 quality PacBio long-read reference genomes from representative accessions of the 12  
108 subpopulations of cultivated rice for which no high-quality reference genomes exist. All  
109 12 genomes were assembled with more than 100x genome coverage PacBio long-read  
110 sequence data and then validated with Bionano optical maps (Udall and Dawe 2018). The  
111 number of contigs covering each of the twelve 12 assemblies, excluding unplaced  
112 contigs, ranged from 15 (GOBOL SAIL (BALAM)::IRGC 26624-2) to 104 (IR 64). The  
113 contig N50 value for the 12 genome data set ranged from 7.35 Mb to 31.91 Mb. When  
114 combined with 4 previously published genomes (i.e. Minghui 63 (MH 63), Zhenshan 97  
115 (ZS 97) (Zhang et al. 2016a, b), N 22 (Stein et al. 2018; updated in 2019) and the IRGSP  
116 RefSeq (Kawahara et al. 2013)), this 16 genome dataset can be used to represent the  
117 K=15 population/admixture structure of cultivated Asian rice.

## 118 **Methods**

### 119 **Ethics statement**

120 This work was approved by the University of Arizona (UA), the King Abdullah  
121 University of Science and Technology (KAUST), Huazhong Agricultural University  
122 (HZAU), the International Rice Research Institute (IRRI) and the International Center for  
123 Tropical Agriculture (CIAT). All methods used in this study were carried out following  
124 approved guidelines.

### 125 **Population structure**

126 We extracted 30 subsets of 100,000 randomly chosen SNPs out of the 3K-RG Core SNP  
127 set v4 (996,009 SNPs, available at [https://snp-seek.irri.org/\\_download.zul](https://snp-seek.irri.org/_download.zul)). For each  
128 subset, we ran ADMIXTURE (Alexander et al. 2009) with the number of ancestral  
129 groups K ranging from 5 to 15. We then aligned the resulting Q matrices using CLUMPP  
130 software (Jakobsson and Rosenberg 2007). Since different runs at a given value of K  
131 often give rise to different refinements (splits) of the lower level grouping, we first  
132 clustered the runs for each K according to similarity of Q matrices using hierarchical  
133 clustering, thus obtaining several clusters of runs for each K. We discarded one-element  
134 clusters (outlier runs), and averaged the Q matrices within each remaining cluster. Figure  
135 S1 shows the admixture proportions taken from the averaged Q matrices of the final

136 clusters for K=9 to 15. The columns of these averaged Q matrices, representing  
137 admixture proportions for groups discovered in different runs, were then used to define  
138 the “K15” grouping. At K=9, 12, and 13, the Q matrices converged to two different  
139 modes according to whether XI-1A or GJ-trop is split (these are labeled as K=9.1, 12.1  
140 and 13.1).

141 The group membership for each sample was defined by applying the threshold of 0.65  
142 to admixture components. Samples with no admixture components exceeding 0.65 were  
143 classified as follows. If the sum of components for subpopulations within the major  
144 groups cA (*circum*-Aus), XI (*Xian*-indica), and GJ (*Geng*-japonica) was  $\geq 0.65$ , the  
145 samples were classified as cA-adm (admixed within cA), XI-adm (within XI) or GJ-adm  
146 (within GJ), respectively, and the remaining samples were deemed ‘fully’ admixed.  
147 The newly defined groups were mostly either aligned with the previous K=9 grouping, or  
148 refined those groups, and they were named accordingly (e.g. XI-1B1 and XI-1B2 are new  
149 subgroups within XI-1B).

150 The phenogram shown in Figure 1 was constructed with DARwin v6  
151 (<http://darwin.cirad.fr/>, unweighted Neighbor-joining) using the identity by state (IBS)  
152 distance matrix from Plink on the 4.8M Filtered SNP set (available at [https://snp-  
153 seek.irri.org/\\_download.zul](https://snp-seek.irri.org/_download.zul)). Colors were assigned to subpopulations based on K15  
154 Admixture results. One entry, MH 63 (XI-adm) represents the admixed types among the  
155 XI group.

## 156 **Sample selection, collection and nucleic acid preparation**

157 To select accessions to represent the 12 subpopulations of Asian rice that lack high-  
158 quality reference genome assemblies, the following strategy was employed. The IBS  
159 distance matrix was used for a principal component analysis (PCA) analysis in R to  
160 generate 5 component axes. Then, for each of the 12 subpopulations, i.e. *circum*-Aus2 =  
161 cA2, *circum*-Basmati = cB, *Geng*-japonica (GJ) subtropical (GJ-subtrp), tropical1 (GJ-  
162 trop1) and tropical2 (GJ-trop2), and *Xian*-indica (XI) subpopulations XI-1B1, XI-1B2,  
163 XI-2A, XI-2B, XI-3A, XI-3B1, XI-3B2, the centroid of each group in the space spanned  
164 by first 5 principal components was determined from the eigenvectors, and the entry  
165 closest to the centroid for which seed was available was chosen as the representative for  
166 that subpopulation (Table 1).

167 Single seed decent (SSD) seed from IR 64 and Azucena were obtained from the Rice  
168 Genetics and Genomics Laboratory, CIAT, in Cali, Colombia, and SSD seed from the

169 remaining 10 accessions (Table 1) were obtained from the International Rice Genebank,  
170 maintained by IRRI, Los Baños, Philippines. All seed were sown in potting soil and  
171 grown under standard greenhouse conditions at UA, Tucson, USA for 6 weeks at which  
172 point they were dark treated for 48-hours to reduce starch accumulation. Approximately  
173 20-50 grams of young leaf tissue was then harvested from each accession and  
174 immediately flash frozen in liquid nitrogen before being stored at -80°C prior to DNA  
175 extraction. High molecular weight genomic DNA was isolated using a modified CTAB  
176 procedure as previously described (Porebski et al. 1997). The quality of each extraction  
177 was checked by pulsed-field electrophoresis (CHEF) on 1% agarose gels for size and  
178 restriction enzyme digestibility, and quantified by Qubit fluorometry (Thermo Fisher  
179 Scientific, Waltham, MA).

### 180 **Library construction and sequencing**

181 Genomic DNA from all 12 accessions were sequenced using the PacBio single-molecule  
182 real-time (SMRT) platform, and the Illumina platform for genome size estimations and  
183 sequence polishing. High molecular weight (HMW) DNA from each accession was  
184 gently sheared into large fragments (*i.e.* 30Kb - 60Kb) using 26-gauge needles and then  
185 end-repaired according to manufacturer's instructions (Pacific Biosciences). Briefly,  
186 using a SMRTbell Express Template Prep Kit, blunt hairpins and sequencing adaptors  
187 were ligated to HMW DNA fragments, and DNA sequencing polymerases were bound to  
188 the SMRTbell templates. Size selection of large fragments (above 15Kb) was performed  
189 using a BluPippin electrophoresis system (Sage Science). The libraries were quantified  
190 using a Qubit Fluorometer (Invitrogen, USA) and the insert mode size was determined  
191 using an Agilent fragment analyzer system with sizes ranging between 30Kb - 40Kb. The  
192 libraries then were sequenced using SMRT Cell 1M chemistry version 3.0 on a PacBio  
193 Sequel instrument. The number of long-reads generated per accession ranged from 2.01  
194 million (LIMA::IRGC 81487-1) to 5.40 million (Azucena). The distribution of subreads  
195 is shown in Figure S2 and the average lengths ranged from 10.58 Kb (Azucena) to 20.61  
196 Kb (LIMA::IRGC 81487-1) (Table 2). According to the estimated genome size of the  
197 IRGSP RefSeq, the average PacBio sequence coverage for each accession varied from  
198 103x (LIMA::IRGC 81487-1) to 149x (IR 64) (Table 2).

199 For Illumina short-read sequencing, HMW DNA from each accession was sheared to  
200 between 250-1000bp, followed by library construction targeting 350bp inserts following  
201 standard Illumina protocols (San Diego, CA, USA). Each library was 2 x 150bp paired-

202 end sequenced using an Illumina X-ten platform. Low-quality bases and paired reads  
203 with Illumina adaptor sequences were removed using *Trimmomatic* (Bolger et al. 2014).  
204 Quality control for each library data set was carried out with *FastQC* (Brown et al. 2017).  
205 Finally, between 36.52-Gb and 51.05-Gb of clean data from each accession was  
206 generated and used for genome size estimation (Table S1) by Kmer analysis (Figure S3)  
207 and the Genome Characteristics Estimation (GCE) program (Liu et al. 2013).

### 208 **Bionano optical genome maps**

209 Bionano optical maps for each accession were generated as previously described (Ou et  
210 al. 2019), except that ultra-HMW DNA isolation, from approximately 4g of flash-frozen  
211 dark-treated (48 hour) leaf tissue per accession, was performed according to a modified  
212 version of the protocol described by Luo and Wing (Luo and Wing, 2003). Prior to  
213 labeling, agarose plugs were digested with agarase and the starch and debris removed by  
214 short rounds of centrifugation at 13,000 X g. DNA samples were further purified and  
215 concentrated by drop dialysis against TE Buffer. Data processing, optical map assembly,  
216 hybrid scaffold construction and visualization were performed using the Bionano Solve  
217 (Version 3.4) and Bionano Access (v12.5.0) software packages  
218 (<https://bionanogenomics.com/>).

### 219 ***De novo* genome assembly**

220 Genome assembly for each of the 12 genomes followed a five-step procedure as shown in  
221 (Figure 2):

222 Step 1: PacBio subreads were assembled *de novo* into contigs using three genome  
223 assembly programs: FALCON (Chin et al. 2016), MECAT2 (Xiao et al. 2017) and  
224 Canu1.5 (Koren et al. 2017). The number of *de novo* assembled contigs obtained varied  
225 from 51 (e.g. NATEL BORO::IRGC 34749-1 and KETAN NANGKA::IRGC 19961-2)  
226 to 1,473 (CHAO MEO::IRGC 80273-1) for the 12 genomes (Table S2).

227 Step 2: Genome Puzzle Master (GPM) software (Zhang et al. 2016c) was used to merge  
228 the *de novo* assembled contigs from the three assemblers, using the high-quality *O. sativa*  
229 vg. indica cv. Minghui 63 reference genome MH63RS2 (Zhang et al. 2016a,b) as a guide.  
230 GPM is a semi-automated pipeline that is used to integrate logical relationship data (*i.e.*  
231 contigs from three assemblers for each accession) based on a reference guide. Contigs  
232 were merged in the ‘assemblyRun’ step, with default parameters (minOverlapSeqToSeq  
233 was set at 1 Kb and identitySeqToSeq was set at 99%). Redundant overlapping sequences



234 were also removed for each assembled contig. In addition, we gave contiguous contigs a  
235 higher priority than ones with gaps to be retained in each assembly. After manual  
236 checking, editing, and redundancy removal, the number of contigs in each assembly  
237 ranged from 26 (NATEL BORO::IRGC 34749-1) to 588 (LIU XU::IRGC 109232-1)  
238 (Table S3).

239 Step 3: The sequence quality of each contig was then improved by “sequence polishing”:  
240 twice with PacBio long reads and once with Illumina short reads. Briefly, PacBio  
241 subreads were aligned to GPM edited contigs using the software *blasr* (Chaisson and  
242 Tesler 2012). All default parameters were used, except minimum align length, which was  
243 set to 500-bp. Secondly, the tool *arrow* as implemented in SMRTlink6.0 (Pacific  
244 Biosciences of California, Inc) was used for polishing the GPM edited contigs. The *bwa-*  
245 *mem* program (Li 2013) was then used for mapping short Illumina reads onto assembled  
246 contigs, and the tool *pilon* (Walker et al. 2014) was used for a final polishing step with  
247 default settings.

248 Step 4: The polished contigs for each accession were arranged into pseudomolecules  
249 using *GPM*, using MH63RS2 (Zhang et al. 2016a,b) as the reference guide. The program  
250 *blastn* (Altschul et al. 1997) with a minimum alignment length of 1 Kb and an e-value <  
251  $1e^{-5}$  as the threshold was used to align the corrected contigs to the reference guide. In  
252 doing so, the corrected contigs were assigned to chromosomes, as well as ordered and  
253 orientated in the GPM assembly viewer function. The number of contigs after step 4  
254 ranged from a minimum of 15 contigs (GOBOL SAIL (BALAM)::IRGC 26624-2) to a  
255 maximum of 104 contigs (IR64) (Table 3). The assembly size for the 12 accessions  
256 ranged from 376.86 Mb (CHAO MEO::IRGC 80273-1) to 393.74 Mb (KHAO YAI  
257 GUANG::IRGC 65972-1) (Table 3) and the length of individual chromosome varied  
258 from 23.06 Mb (chromosome 9 of CHAO MEO::IRGC 80273-1) to 44.96 Mb  
259 (chromosome 1 of LIMA::IRGC 81487-1) (Table S4). The average N50 value was 23.10  
260 Mb, with the highest and the lowest values being 30.91 Mb (LIU XU::IRGC 109232-1)  
261 and 7.35 Mb (IR 64), respectively. The average number of gaps among the 12 new  
262 genome assemblies was 18, with 8 assemblies containing less than 10 gaps (Table 3).

263 Step 5: To independently validate our assemblies, we generated and compared Bionano  
264 optical maps to each assembly. In total, 17 (Azucena) to 56 (LIU XU::IRGC 109232-1)  
265 Bionano optical maps were constructed for all 12 rice accessions, which yielded contig  
266 N50 values of between 22.75 Mb (CHAO MEO::IRGC 80273-1) to 31.45 Mb (KHAO  
267 YAI GUANG::IRGC 65972-1) (Table S5). As shown in Figure 3 and Figure S4, the

268 chromosomes and/or chromosome arms of all 12 *de novo* assemblies were highly  
269 supported by these ultra-long optical maps. Although rare, a few discrepancies between  
270 the optical maps and genome assemblies can be seen and are likely due to small errors  
271 and chimeras that can be produced through both the optical mapping and sequence  
272 assembly pipelines (Udall and Dawe 2018).

273 Following these five steps, we were able to produce 12 near-gap-free *Oryza sativa*  
274 platinum standard reference genome sequences (PSRefSeqs) that represent 12 of 15  
275 subpopulations of cultivated Asian rice.

### 276 **BUSCO evaluation**

277 The Benchmarking Universal Single-Copy Orthologs (BUSCO3.0) software package  
278 (Simao et al. 2015) was employed to evaluate the gene space completeness of the 12  
279 genome assemblies. These genomes captured, on average, 97.9% of the BUSCO  
280 reference gene set, with a minimum of 95.7% (IR64) and a maximum of 98.6% (LARHA  
281 MUGAD::IRGC 52339-1 and KHAO YAI GUANG::IRGC 65972-1) (Table 3).

282 Of note, when performing this analysis, we observed that on average 30 out of the  
283 1,440 conserved BUSCO genes tested (<https://www.orthodb.org/v9/index.html>) were  
284 missing from each new assembly, 16 of which were not present in all 12, plus the IRGSP,  
285 ZS 97, MH 63 and N 22 RefSeqs (Figure S5). This result suggested that these 16  
286 “conserved” genes may not exist in rice, or other cereal genomes, thereby artificially  
287 reducing the BUSCO gene space scores for our 12 assemblies. To test this hypothesis, we  
288 searched for all 16 genes missing in maize, which diverged from rice about 50 million  
289 years ago (MYA) (Wolfe et al., 1989, Gale et al., 1998 and Guo et al., 2019). We found  
290 that 13 of the 16 genes in question could not be found in 3 high-quality recently  
291 published maize genome assemblies (Figure S5) and therefore, concluded that 13 of the  
292 16 “conserved” genes in the BUSCO database are not present in cereals, and should be  
293 excluded from our gene space analysis. Taking this into account, we recalculated the  
294 BUSCO gene space content for each of 12 assemblies and found that 10 of 12 assemblies  
295 captured more than 98% of the BUSCO gene set (Table 3).

### 296 **Transposable element (TE) prediction**

297 To determine the pan-transposable element content of cultivated Asian rice we analyzed  
298 the 12 new reference genomes, presented here, along with the MH 63, ZS 97, N 22  
299 PacBio reference genomes. In addition, we also included a reanalysis of the IRGSP

300 RefSeq as it is conventionally considered the standard rice genome for which all  
301 comparisons are conducted. This 16 genome data set was used to represent the K=15  
302 population structure of cultivated Asian rice.

303 A search for sequences similar to TEs was carried out using RepeatMasker (Smit  
304 AFA et al, 2013) run under default parameters with the exception of the options: -  
305 `no_is -nolow`. RepeatMasker was run using the library “rice 7.0.0.liban”, which is  
306 an updated in-house version of the publicly available MSU\_6.9.5 library (Ou et al. 2019),  
307 retrieved from  
308 [https://github.com/oushujun/EDTA/blob/master/database/Rice\\_MSU7.fasta.std6.9.5.out](https://github.com/oushujun/EDTA/blob/master/database/Rice_MSU7.fasta.std6.9.5.out).  
309 The average TE content of this 16 genome data set was 47.66% with a minimum value of  
310 46.07% in IRGSP RefSeq and a maximum of 48.27% in KHAO YAI GUANG::IRGC  
311 65972-1 (Table 4). The major contribution to this fraction was composed of long terminal  
312 repeat retrotransposons (LTR-RTs, min: 23.55%, max: 27.27% and average: 25.96%)  
313 followed by DNA-TEs (min: 14.87%, max, 16.18% and average: 15.26%). Long  
314 interspersed nuclear elements (LINEs) and short interspersed nuclear elements (SINEs)  
315 were identified as on average 1.43% and 0.39% of the 16 genomes, respectively.

### 316 **Structural Variants**

317 Each genome assembly (n=16), as described above, was fragmented using the EMBOSS  
318 tool *splitter* (Rice et al. 2000) to create a 10x genome equivalent redundant set of 50kb  
319 reads. These reads were then mapped onto every other genome assembly using the tool  
320 *NGMLR* (Sedlazeck et al. 2018). Finally, the software *SVIM* (Heller and Vingron 2019)  
321 was run under default parameters to parse the mapping output. Only insertions, deletions  
322 and tandem duplications up to a maximum length of 25 Kb were considered in this  
323 analysis.

324 The results of this analysis identified several thousand insertions and deletions  
325 whenever an assembly was compared to any other. Greater variability was found between  
326 varieties belonging to different major groups (e.g. *Geng-japonica* vs. *Xian-indica*) than  
327 occurred between those within these groups. The amount of genome sequences with  
328 structural variation between any two varieties ranged from 17.57 Mb to 41.54 Mb for  
329 those belonging to the indica (XI, *Xian-indica*) varietal group (avg: 31.75 Mb) and from  
330 18.55 Mb to 23.07 Mb (avg: 21.00 Mb) for those in the japonica (GJ, *Geng-japonica*)  
331 varietal group. When all 16 genomes are considered together, the range is between 17.57  
332 Mb and 41.54 Mb, with an average value of 33.70 Mb (Table S6). The total unshared

333 fraction collected out of all pairwise comparisons was composed for 89.89% by TE  
334 related sequences.

### 335 **Data Records**

336 Data for all 12 genome shotgun sequencing projects have been deposited in Genbank  
337 (<https://www.ncbi.nlm.nih.gov/>), including PacBio raw data, Illumina raw data, Bionano  
338 optical maps and the twelve PSRefSeqs. The BioProjects, BioSamples, Genome  
339 assemblies, Sequence Read Archives (SRA) accession and supplementary files (Bionano  
340 optical maps) of 12 genomes are listed in Table 3.

### 341 **Technical Validation**

342 DNA sample quality

343 DNA quality was checked by pulsed-field gel electrophoresis for size and restriction  
344 enzyme digestibility. Nucleic acid concentrations were quantified by Qubit fluorometry  
345 (Thermo Fisher Scientific, Waltham, MA).

346

347 Illumina libraries

348 Illumina libraries were quantified by qPCR using the KAPA Library Quantification Kit  
349 for Illumina Libraries (KapaBiosystems, Wilmington, MA, USA), and library profiles  
350 were evaluated with an Agilent 2100 Bioanalyzer (Agilent Technologies, Santa Clara,  
351 CA, USA).

352

353 Gene Space Completeness

354 Benchmarking Universal Single-Copy Orthologs (BUSCO3.0) was executed using the  
355 `embryophyta_odb9.tar.gz` database to assess the gene space of each genome, minus 13  
356 genes that do not appear to exist in the cereal genomes tested (Figure S5).

357

358 Assembly accuracy

359 Bionano optical maps were generated and used to validate all 12 genome assemblies.

360

361 This paper is the first release of 12 PSRefSeqs, optical maps and all associated raw data  
362 for the accessions listed in Table 3.

363 **Code Availability**

364 The population re-analysis of 3K-RG dataset and 12 genome assemblies were obtained  
365 using several publicly available software packages. To allow researchers to precisely  
366 repeat any steps, the settings and the parameters used are provided below:

367

368 Population structure

369 ADMIXTURE (Alexander et al. 2009) was run with default options. The R scripts for  
370 further population structure analysis, including setting up CLUMPP files, can be found in  
371 Github repository <https://github.com/dchebotarov/Q-aggr>.

372

373 Genome size estimation:

374 The K-mer and GCE program (Liu et al. 2013) were employed for genome size  
375 estimation. Command line:

```
376 kmer_freq_hash -k (13-17) -l genome.list -a 10 -d 10 -t 8 -  
377 i 400000000 -o 0 -p genom_kmer(13-17) &> genom_kmer(13-  
378 17)_freq.log, and gce -f genom_kmer(13-17).freq.stat -c  
379 $peak -g #amount -m 1 -D 8 -b 1 -H 1 > genom_kmer(13-17).log  
380 genom_kmer(13-17).log
```

381

382 Genome assembly:

383 (1) *MECAT2*: all parameters were set to the defaults. Command line:

```
384 mecat.pl config_file.txt, mecat.pl correct config_file.txt  
385 and mecat.pl assemble config_file.txt
```

386 (2) *Canu1.5*: all parameters were set to the defaults. Command line:

```
387 canu -d canu -p canu genomeSize=400m -pacbio-raw  
388 rawreads.fasta
```

389 (3) *FALCON*: all parameters were set to the defaults. Command line:

```
390 fc_run.py fc_run.cfg &>fc_run.out
```

391 (4) *GPM*: manual edit with merging *de novo* assemblies from *MECAT2*, *Canu1.5*, and  
392 *FALCON*.

393 Polishing:

394 (1) *arrow*: all parameters were set to the defaults except alignment length = 500  
395 bp. The *arrow* polish was carried out by the SMRT Link v6.0 webpage  
396 (<https://www.pacb.com/support/software-downloads/>).

397 (2) *pilon1.18*: all parameters were set to the defaults and *pilon* polish was carried out as  
398 recommended at the SMRT Link v6.0 ([https://www.pacb.com/support/software-](https://www.pacb.com/support/software-downloads/)  
399 [downloads/](https://www.pacb.com/support/software-downloads/)).

400

401 BUSCO:

402 The BUSCO3.0 version was employed in this study. Command line: `run_BUSCO.py`  
403 `-i genome.fasta -o genome -l embryophyta_odb9 -m genome -c`  
404 `16`

405

406 RepeatMasker:

407 The repeat sequences were employed with the library `rice7.0.0_liban` in-house. Command  
408 line: `RepeatMasker -pa 24 -x -no_is -nolow -cutoff 250 -lib`  
409 `rice7.0.0_liban.txt genome.fasta`

## 410 **Acknowledgements**

411 This research was supported by the AXA Research Fund (International Rice Research  
412 Institute), the King Abdullah University of Science & Technology, and the Bud Antle  
413 Endowed Chair for Excellent in Agriculture (University of Arizona) to R.A.W., the Start-  
414 up Fund of Huazhong Agricultural University to J.Z., and funding from the Taiwan  
415 Council of Agriculture to IRRI. The BUSCO analysis data for maize was kindly  
416 provided by Dr. Wu and Dr. Li from the Institute of Plant Physiology and  
417 Ecology, and Dr. Wang from Shanghai Jiao Tong University. One of two TE  
418 libraries used for repeat analysis was provided by Dr. Eric Laserre (University of  
419 Perpignan, France)

## 420 **Author contributions**

421 J.Z., K.M., D.C., M.L., N.A., N.R.S.H., H.L., R.M, and R.A.W. designed and conceived  
422 the research. D.C. and K.M. perform the population structure analysis. K.M., M.L.,  
423 L.J.A., N.L. generated and provided SSD seed 12 *O. sativa* accessions. D.K., S.L., S.R.,

424 N.M prepared DNA and performed PacBio and Illumina sequencing. C.S.-S. managed all  
425 PacBio and Illumina sequence data processing and transfer. P.P. and V.L. generated all  
426 Bionano optical maps. J.Z. and Y.Z. performed sequence assembly. Y.Z. carried out  
427 genome size estimation, GPM editing, assembly polishing and data submission. V.L. and  
428 Y.Z. analyzed the Bionano optical maps and the validation of 12 PSRefSeqs. A.Z. and  
429 Y.Z. carried out TE prediction and structural analysis. Y.Z., N.A., A.Z., J.Z., D.C., M.L.,  
430 K.M., N.M. and R.A.W. wrote and edited the paper. All authors read and approved the  
431 final manuscript.

### 432 **Competing interests**

433 The authors declare that there is no conflict of interest regarding the publication of this  
434 article.

435 **Figure legends**

436 **Figure 1.** Phylogenetic tree with the accession selected for PSRefSeq sequencing for  
437 each of the K=15 subpopulations and a single admixture group. Groups are colored  
438 according to the assignment from Admixture analysis. The subpopulation designation is  
439 in parentheses following the name.

440 **Figure 2.** Genome assembly and validation pipeline.

441 **Figure 3.** Bionano optical map validation of chromosome 1 for 12 *de novo* assemblies.



442 Figure 1

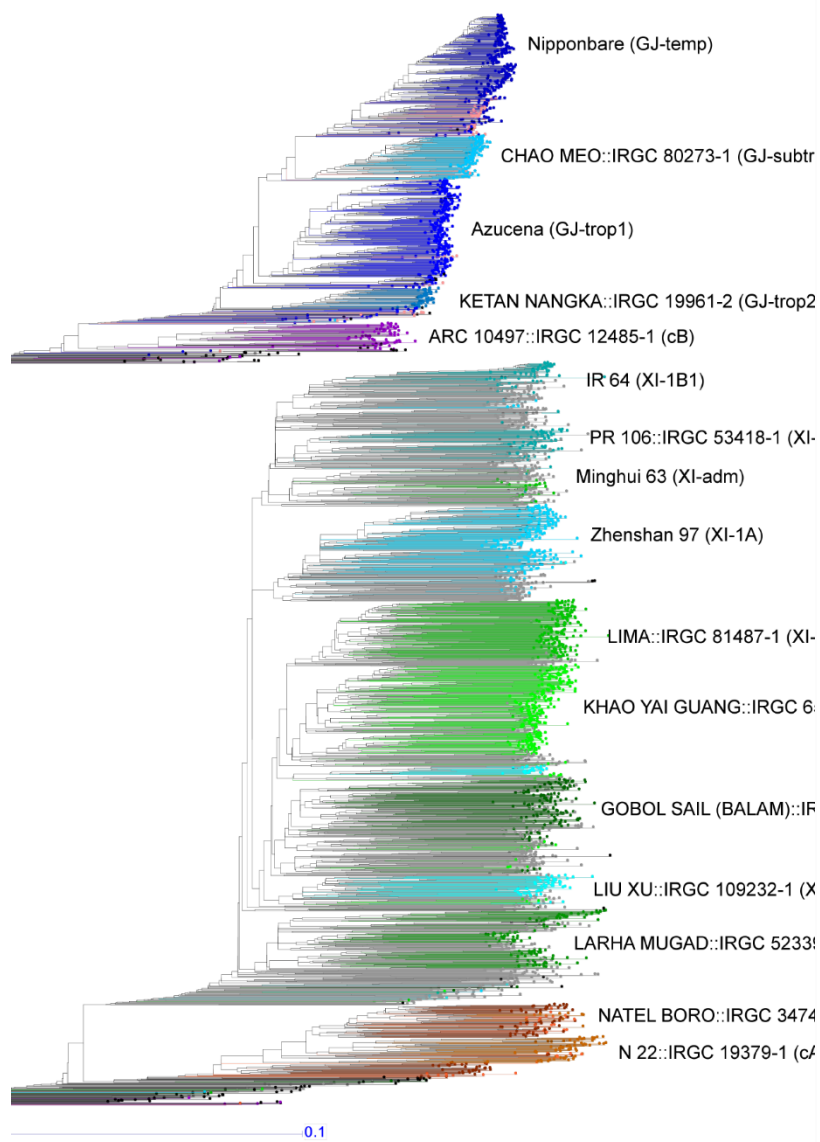

443 Figure 2

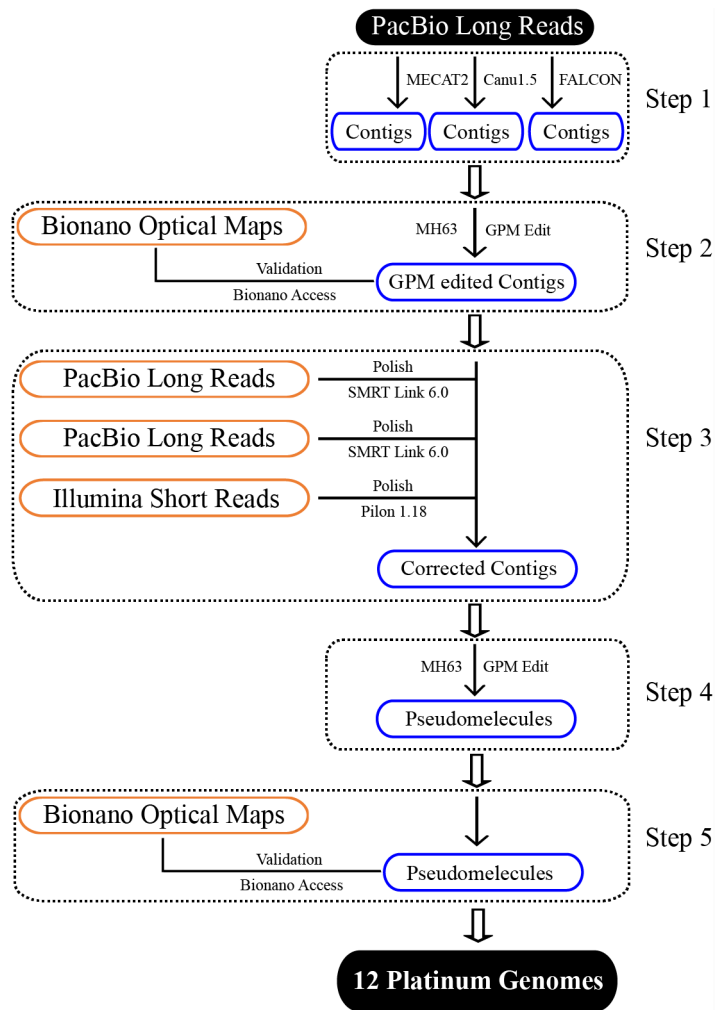

444 Figure 3

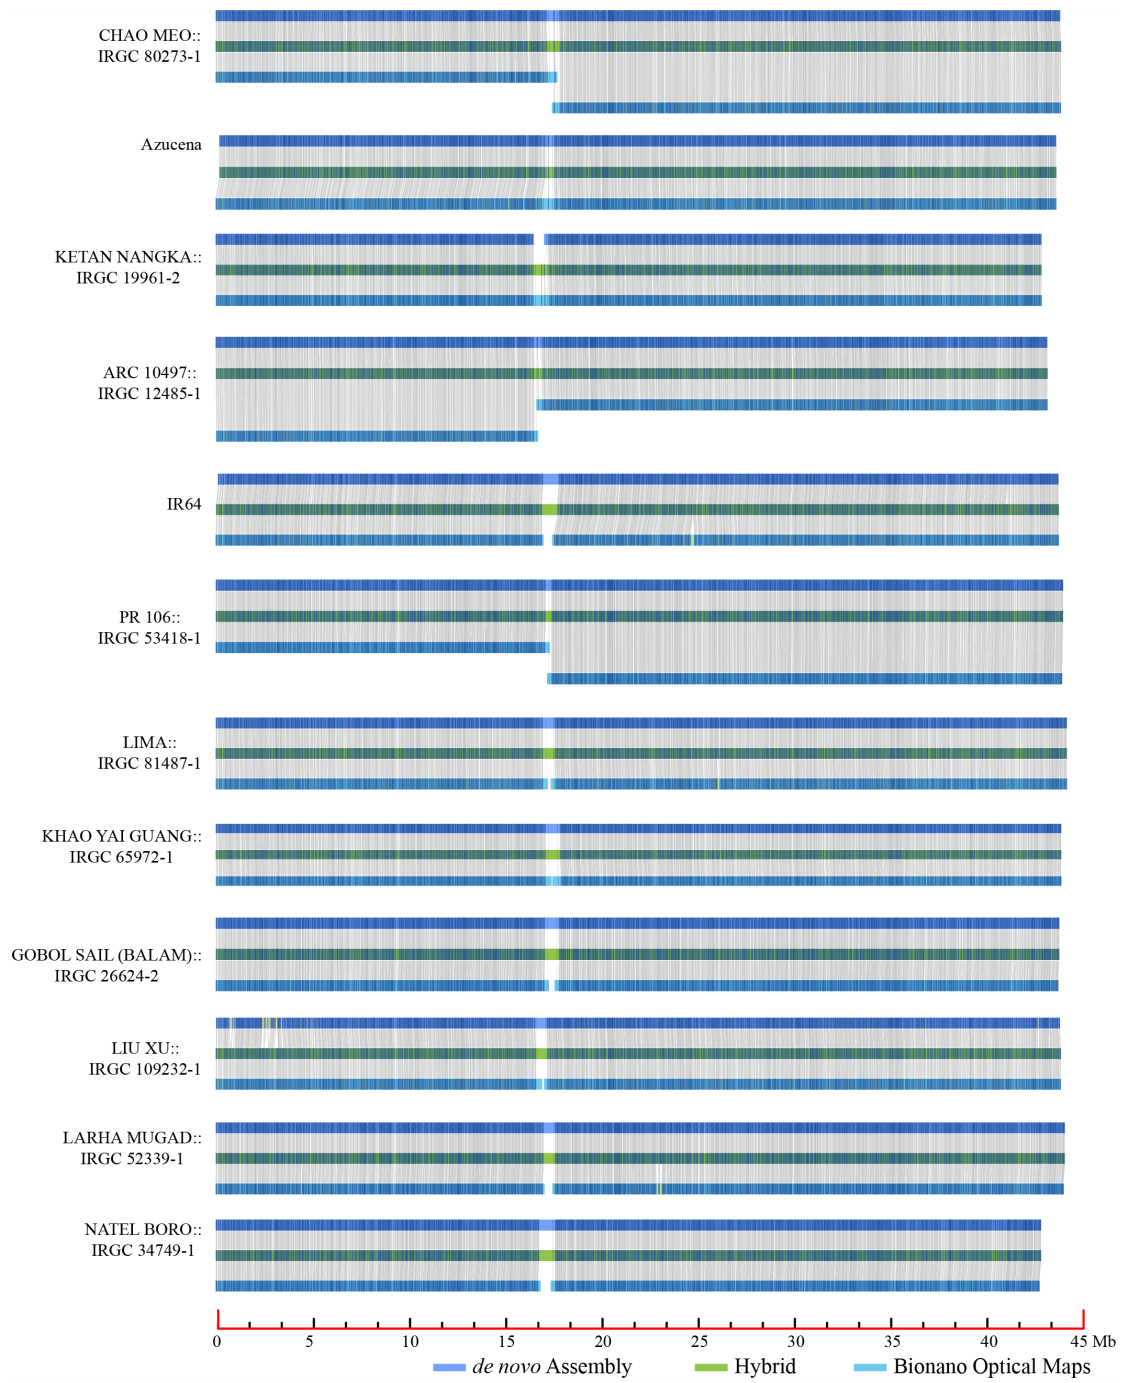

445 **Tables**

446 Table 1. Sample collection information for 12 *Oryza sativa* accessions.

447 Table 2. Sequencing platforms used and data statistics for the 12 *Oryza sativa* genomes.

448 Table 3. *de novo* assembly, BUSCO evaluation and accession numbers in GenBank of the

449 12 *Oryza sativa* genomes.

450 Table 4. Abundance of the major TE classes in the 16 *Oryza sativa* genomes.

451 Table 1.

| Variety Name                     | Genetic Stock ID | Country Origin | 12 subpopulations |
|----------------------------------|------------------|----------------|-------------------|
| CHAO MEO::IRGC 80273-1           | IRGC 132278      | Lao PDR        | GJ-subtrp         |
| Azucena                          | I1A41685         | Philippines    | GJ-trop1          |
| KETAN NANGKA::IRGC 19961-2       | IRGC 128077      | Indonesia      | GJ-trop2          |
| ARC 10497::IRGC 12485-1          | IRGC 117425      | India          | cB                |
| IR 64                            | I1A42114         | Philippines    | XI-1B1            |
| PR 106::IRGC 53418-1             | IRGC 127742      | India          | XI-1B2            |
| LIMA::IRGC 81487-1               | IRGC 127564      | Indonesia      | XI-3A             |
| KHAO YAI GUANG::IRGC 65972-1     | IRGC 127518      | Thailand       | XI-3B1            |
| GOBOL SAIL (BALAM)::IRGC 26624-2 | IRGC 132424      | Bangladesh     | XI-2A             |
| LIU XU::IRGC 109232-1            | IRGC 125827      | China          | XI-3B2            |
| LARHA MUGAD::IRGC 52339-1        | IRGC 125619      | India          | XI-2B             |
| NATEL BORO::IRGC 34749-1         | IRGC 127652      | Bangladesh     | cA2               |

Subpopulations: GJ = *Geng-japonica* where trop = tropical, subtrp = subtropical; cB = *circum-Basmati*; XI = *Xian-indica*; cA = *circum-Aus*

452 Table 2.

| Variety Name                     | Sequencing platform | Raw data (Gb) | Depth | Number of subreads (M) | Mean subread length (Kb) |
|----------------------------------|---------------------|---------------|-------|------------------------|--------------------------|
| CHAO MEO::IRGC 80273-1           | PacBio Sequel       | 49.1          | 123X  | 4.26                   | 11.526                   |
| Azucena                          | PacBio Sequel       | 57.1          | 143X  | 5.40                   | 10.581                   |
| KETAN NANGKA::IRGC 19961-2       | PacBio Sequel       | 49.8          | 125X  | 2.78                   | 17.876                   |
| ARC 10497::IRGC 12485-1          | PacBio Sequel       | 44.7          | 112X  | 4.06                   | 11.026                   |
| IR 64                            | PacBio Sequel       | 59.7          | 149X  | 5.24                   | 11.393                   |
| PR 106::IRGC 53418-1             | PacBio Sequel       | 42.2          | 105X  | 2.08                   | 20.317                   |
| LIMA::IRGC 81487-1               | PacBio Sequel       | 41.4          | 103X  | 2.01                   | 20.612                   |
| KHAO YAI GUANG::IRGC 65972-1     | PacBio Sequel       | 42.5          | 106X  | 2.37                   | 17.954                   |
| GOBOL SAIL (BALAM)::IRGC 26624-2 | PacBio Sequel       | 42.2          | 105X  | 2.13                   | 19.777                   |
| LIU XU::IRGC 109232-1            | PacBio Sequel       | 55.3          | 138X  | 3.66                   | 15.109                   |
| LARHA MUGAD::IRGC 52339-1        | PacBio Sequel       | 45.1          | 113X  | 3.22                   | 14.011                   |
| NATEL BORO::IRGC 34749-1         | PacBio Sequel       | 44.4          | 111X  | 2.74                   | 16.2                     |

453 Table 3.

| Variety Name                     | BioProject  | BioSample    | Genome size (bp) | # Contigs | Contig N50 (Mb) | # Gaps | Scaffold N50 (Mb) | BUSCO  | Adjust BUSCO | Genome Accession | SRP       | Supplementary Files (Bionano optical map) |
|----------------------------------|-------------|--------------|------------------|-----------|-----------------|--------|-------------------|--------|--------------|------------------|-----------|-------------------------------------------|
| CHAO MEO::IRGC 80273-1           | PRJNA565484 | SAMN12748601 | 376,856,903      | 55        | 11.02           | 43     | 30.35             | 97.60% | 98.49%       | VYIH00000000     | SRP226088 | SUPPF_0000003210                          |
| Azucena                          | PRJNA424001 | SAMN08217222 | 379,627,553      | 28        | 22.94           | 16     | 30.95             | 97.80% | 98.69%       | PKQC00000000     | SRP227255 | SUPPF_0000003212                          |
| KETAN NANGKA::IRGC 19961-2       | PRJNA564615 | SAMN12718029 | 380,759,091      | 21        | 22.68           | 9      | 30.70             | 98.00% | 98.89%       | VYIC00000000     | SRP226080 | SUPPF_0000003204                          |
| ARC 10497::IRGC 12485-1          | PRJNA565479 | SAMN12748569 | 378,463,869      | 40        | 17.92           | 28     | 30.57             | 98.40% | 99.30%       | VYID00000000     | SRP226093 | SUPPF_0000003206                          |
| IR 64                            | PRJNA509165 | SAMN10564385 | 386,698,898      | 104       | 7.35            | 92     | 31.22             | 95.70% | 96.57%       | RWKJ00000000     | SRP227298 | SUPPF_0000003213                          |
| PR 106::IRGC 53418-1             | PRJNA563359 | SAMN12672924 | 391,176,105      | 16        | 27.05           | 4      | 32.03             | 96.60% | 97.48%       | VYIB00000000     | SRP226078 | SUPPF_0000003202                          |
| LIMA::IRGC 81487-1               | PRJNA564572 | SAMN12715984 | 392,625,308      | 17        | 27.37           | 5      | 32.42             | 98.50% | 99.40%       | VXJH00000000     | SRP226079 | SUPPF_0000003203                          |
| KHAO YAI GUANG::IRGC 65972-1     | PRJNA565481 | SAMN12748590 | 393,737,720      | 19        | 21.82           | 7      | 32.08             | 98.60% | 99.50%       | VYIF00000000     | SRP226086 | SUPPF_0000003208                          |
| GOBOL SAIL (BALAM)::IRGC 26624-2 | PRJNA564763 | SAMN12721963 | 391,772,995      | 15        | 29.60           | 3      | 31.75             | 97.90% | 98.79%       | VXJI00000000     | SRP226082 | SUPPF_0000003205                          |
| LIU XU::IRGC 109232-1            | PRJNA577228 | SAMN13021815 | 392,033,263      | 17        | 30.91           | 5      | 32.30             | 98.40% | 99.30%       | WGGU00000000     | SRP226085 | SUPPF_0000003211                          |
| LARHA MUGAD::IRGC 52339-1        | PRJNA565480 | SAMN12748589 | 390,195,943      | 16        | 30.75           | 4      | 32.10             | 98.60% | 99.50%       | VYIE00000000     | SRP226084 | SUPPF_0000003207                          |
| NATEL BORO::IRGC 34749-1         | PRJNA565483 | SAMN12748600 | 383,720,936      | 16        | 27.83           | 4      | 31.31             | 98.10% | 98.99%       | VYIG00000000     | SRP226087 | SUPPF_0000003209                          |

454 Table 4.

| Variety Name                     | TOTAL | LTR-RT | LINEs | SINEs | DNA_TEs | Unclassified |
|----------------------------------|-------|--------|-------|-------|---------|--------------|
| NIPPONBARE                       | 46.07 | 23.55  | 1.52  | 0.41  | 16.18   | 4.41         |
| CHAO MEO::IRGC 80273-1           | 46.25 | 24.00  | 1.46  | 0.40  | 15.59   | 4.80         |
| Azucena                          | 47.07 | 24.48  | 1.47  | 0.40  | 15.82   | 4.89         |
| KETAN NANGKA::IRGC 19961-2       | 46.99 | 24.87  | 1.47  | 0.40  | 15.72   | 4.53         |
| ARC 10497::IRGC 12485-1          | 46.95 | 24.74  | 1.48  | 0.40  | 15.68   | 4.65         |
| IR 64                            | 47.87 | 26.82  | 1.42  | 0.40  | 14.97   | 4.26         |
| PR 106::IRGC 53418-1             | 47.95 | 26.82  | 1.41  | 0.39  | 15.05   | 4.28         |
| Minghui 63                       | 47.97 | 26.61  | 1.44  | 0.4   | 15.3    | 4.22         |
| Zhenshan 97                      | 47.95 | 26.79  | 1.42  | 0.39  | 15.19   | 4.16         |
| LIMA::IRGC 81487-1               | 48.04 | 26.87  | 1.40  | 0.39  | 15.01   | 4.37         |
| KHAO YAI GUANG::IRGC 65972-1     | 48.27 | 27.27  | 1.40  | 0.39  | 14.87   | 4.34         |
| GOBOL SAIL (BALAM)::IRGC 26624-2 | 48.15 | 26.99  | 1.40  | 0.39  | 14.99   | 4.38         |
| LIU XU::IRGC 109232-1            | 46.92 | 27.06  | 1.26  | 0.32  | 14.31   | 3.97         |
| LARHA MUGAD::IRGC 52339-1        | 48.05 | 26.74  | 1.41  | 0.39  | 15.09   | 4.42         |
| NATEL BORO::IRGC 34749-1         | 47.33 | 25.75  | 1.42  | 0.40  | 15.12   | 4.64         |
| N 22::IRGC 19379-1               | 47.79 | 25.95  | 1.44  | 0.39  | 15.20   | 4.81         |



455 **References**

- 456 3K RGP. The 3,000 rice genomes project. *GigaScience* 3.1 (2014): 2047-217X.
- 457 Altschul, S.F. *et al.* Gapped BLAST and PSI-BLAST: a new generation of protein database search  
458 programs. *Nucleic acids research* 25.17 (1997): 3389-3402.
- 459 Bolger, A. M., Marc L., and Bjoern U. Trimmomatic: a flexible trimmer for Illumina sequence  
460 data. *Bioinformatics* 30.15 (2014): 2114-2120.
- 461 Brown, J., Meg P., and Lee A.M. FQC Dashboard: integrates FastQC results into a web-based,  
462 interactive, and extensible FASTQ quality control tool. *Bioinformatics* 33.19 (2017): 3137-3139.
- 463 Chaisson, M.J., and Glenn T. Mapping single molecule sequencing reads using basic local alignment  
464 with successive refinement (BLASR): application and theory. *BMC bioinformatics* 13.1 (2012):  
465 238.
- 466 Chin, C. *et al.* Phased diploid genome assembly with single-molecule real-time sequencing. *Nature*  
467 *methods* 13.12 (2016): 1050.
- 468 Alexander, D.H., John N., and Kenneth L. Fast model-based estimation of ancestry in unrelated  
469 individuals. *Genome research* 19.9 (2009): 1655-1664.
- 470 Gale, M.D., and Katrien M.D. Comparative genetics in the grasses. *Proceedings of the National*  
471 *Academy of Sciences* 95.5 (1998): 1971-1974.
- 472 Guo, H. *et al.* Gene duplication and genetic innovation in cereal genomes. *Genome research* 29.2  
473 (2019): 261-269.
- 474 Heller, D., and Martin V. SVIM: structural variant identification using mapped long  
475 reads. *Bioinformatics* 35.17 (2019): 2907-2915.
- 476 Huang, X.H. *et al.* A map of rice genome variation reveals the origin of cultivated  
477 rice. *Nature* 490.7421 (2012): 497.
- 478 International Rice Genome Sequencing Project. The map-based sequence of the rice  
479 genome. *Nature* 436.7052 (2005): 793.
- 480 Jakobsson, M., and Noah A.R.. CLUMPP: a cluster matching and permutation program for dealing  
481 with label switching and multimodality in analysis of population structure. *Bioinformatics* 23.14  
482 (2007): 1801-1806.
- 483 Kawahara, Y. *et al.* Improvement of the *Oryza sativa* Nipponbare reference genome using next  
484 generation sequence and optical map data. *Rice* 6.1 (2013): 4.
- 485 Koren, S. *et al.* Canu: scalable and accurate long-read assembly via adaptive k-mer weighting and  
486 repeat separation. *Genome research* 27.5 (2017): 722-736.
- 487 Li, H. Aligning sequence reads, clone sequences and assembly contigs with BWA-MEM. *arXiv*  
488 *preprint arXiv:1303.3997* (2013).
- 489 Li, J.Y., Wang J., and Robert S.Z. The 3,000 rice genomes project: new opportunities and challenges  
490 for future rice research. *GigaScience* 3.1 (2014): 8.
- 491 Liu, B. *et al.* Estimation of genomic characteristics by analyzing k-mer frequency in de novo genome  
492 projects. *arXiv preprint arXiv:1308.2012* (2013).
- 493 Luo, M., and Wing. A.R. An improved method for plant BAC library construction. *Plant functional*  
494 *genomics*. Humana Press, 2003. 3-19.
- 495 McNally, K. L. *et al.* Genomewide SNP variation reveals relationships among landraces and modern  
496 varieties of rice. *Proceedings of the National Academy of Sciences* 106.30 (2009): 12273-12278.
- 497 Merrey, D. J. *et al.* Agricultural Development and Sustainable Intensification. Routledge, 2018.

- 498 Ou, S. *et al.* Effect of sequence depth and length in long-read assembly of the maize inbred  
499 nc358. *BioRxiv* (2019): 858365.
- 500 Ou, S. *et al.* Benchmarking Transposable Element Annotation Methods for Creation of a Streamlined,  
501 Comprehensive Pipeline. *bioRxiv* (2019): 657890.
- 502 Porebski, S., Bailey, L. G., & Baum, B. R. Modification of a CTAB DNA extraction protocol for  
503 plants containing high polysaccharide and polyphenol components. *Plant molecular biology*  
504 *reporter* 15.1 (1997): 8-15.
- 505 Rhoads, A., and Kin F.A. PacBio sequencing and its applications. *Genomics, proteomics &*  
506 *bioinformatics* 13.5 (2015): 278-289.
- 507 Rice, P., Ian L., and Alan B. EMBOSS: the European molecular biology open software suite. (2000):  
508 276-277.
- 509 Sedlazeck, F. J. *et al.* Accurate detection of complex structural variations using single-molecule  
510 sequencing. *Nature methods* 15.6 (2018): 461.
- 511 Simão, F. A., *et al.* BUSCO: assessing genome assembly and annotation completeness with single-  
512 copy orthologs. *Bioinformatics* 31.19 (2015): 3210-3212.
- 513 Stein, J. C., *et al.* Genomes of 13 domesticated and wild rice relatives highlight genetic conservation,  
514 turnover and innovation across the genus *Oryza*. *Nature genetics* 50.2 (2018): 285.
- 515 Maja T. and Chen N. Using RepeatMasker to identify repetitive elements in genomic  
516 sequences. *Current protocols in bioinformatics* 25.1 (2009): 4-10.
- 517 Thomson, M J. *et al.* Large-scale deployment of a rice 6 K SNP array for genetics and breeding  
518 applications. *Rice* 10.1 (2017): 40.
- 519 Udall, J. A., and Kelly D. Is it ordered correctly? Validating genome assemblies by optical  
520 mapping. *The Plant Cell* 30.1 (2018): 7-14.
- 521 Walker, B. J., *et al.* Pilon: an integrated tool for comprehensive microbial variant detection and  
522 genome assembly improvement. *PloS one* 9.11 (2014): e112963.
- 523 Wang, W. *et al.* Genomic variation in 3,010 diverse accessions of Asian cultivated  
524 rice. *Nature* 557.7703 (2018): 43.
- 525 Wing, A.W., Michael D. P., and Zhang Q.F. The rice genome revolution: from an ancient grain to  
526 Green Super Rice. *Nature Reviews Genetics* 19.8 (2018): 505-517.
- 527 Wolfe, K. H. *et al.* Date of the monocot-dicot divergence estimated from chloroplast DNA sequence  
528 data. *Proceedings of the National Academy of Sciences* 86.16 (1989): 6201-6205.
- 529 Xiao, C. *et al.* MECAT: fast mapping, error correction, and de novo assembly for single-molecule  
530 sequencing reads. *nature methods* 14.11 (2017): 1072.
- 531 Zhang, J. *et al.* Building two indica rice reference genomes with PacBio long-read and Illumina  
532 paired-end sequencing data. *Scientific data* 3 (2016): 160076.
- 533 Zhang, J. *et al.* Extensive sequence divergence between the reference genomes of two elite indica rice  
534 varieties Zhenshan 97 and Minghui 63. *Proceedings of the National Academy of Sciences* 113.35  
535 (2016): E5163-E5171.
- 536 Zhang, J. *et al.* Genome puzzle master (GPM): an integrated pipeline for building and editing  
537 pseudomolecules from fragmented sequences. *Bioinformatics* 32.20 (2016): 3058-3064.
- 538 Zhao, Q. *et al.* Pan-genome analysis highlights the extent of genomic variation in cultivated and wild  
539 rice. *Nature genetics* 50.2 (2018): 278.

540 **Supplementary Information**

541 **Supplementary file1**

542 **Supplementary Table 1.** Summary of Illumina genome survey sequences for 12 *Oryza*  
543 *sativa* genomes.

544 **Supplementary Table 2.** Genome features of *de novo* assemblies for 12 *Oryza sativa*  
545 accessions by Canu1.5, FALCON and MECAT2.

546 **Supplementary Table 3.** Genome features of 12 *Oryza sativa* accessions by GPM  
547 editing.

548 **Supplementary Table 4.** Chromosome length (Mb) of 12 *Oryza sativa* genomes.

549 **Supplementary Table 5.** Bionano optical map statistics of 12 *Oryza sativa* genomes.

550 **Supplementary Table 6.** Summary of large structural variation (>50 bp) by comparison  
551 of each of 16 genomes to every other genome (including 12 genomes from this study and  
552 4 previously reported: MH63, ZS97, N 22 and the IRGSP RefSeq).

553 **Supplementary file2**

554 **Supplementary Figure 1.** Admixture results for K=5 to 15. The samples are grouped  
555 according to the new classification. At K=9,12,13, the Q matrices converged to two  
556 different modes, differing according to whether ind1A is split, or tropical japonica.

557 **Supplementary Figure 2.** Length distribution of PacBio long reads used for 12 *Oryza*  
558 *sativa* genome assemblies.

559 **Supplementary Figure 3.** K-mer analysis of Illumina short sequences that were used for  
560 genome size estimation with the GCE program.

561 **Supplementary Figure 4.** Bionano Access visualization view for 12 *de novo* assemblies  
562 with Bionano optical maps and their underlying alignments.

563 **Supplementary Figure 5.** Summary of missing genes in the BUSCO gene space  
564 evaluation of 12 *de novo Oryza sativa* assemblies, 4 public *Oryza sativa* PSRefSeqs and  
565 3 high-quality *Zea mays* genomes.
